# Supplementary material for: The bile acid receptor GPBAR1 (TGR5) is expressed in human gastric cancers and promotes epithelial-mesenchymal transition in gastric cancer cell lines
Source: PubMed Central journal article supplement (PMC5308633; doi:10.18632/oncotarget.10477), 2016-07-07
Supplement: oncotarget-07-61021-s001.pdf [file oncotarget-07-61021-s001.pdf]

## The bile acid receptor GPBAR1 (TGR5) is expressed in human gastric cancers and promotes epithelial-mesenchymal transition in gastric cancer cell lines

### SUPPLEMENTARY INFORMATION

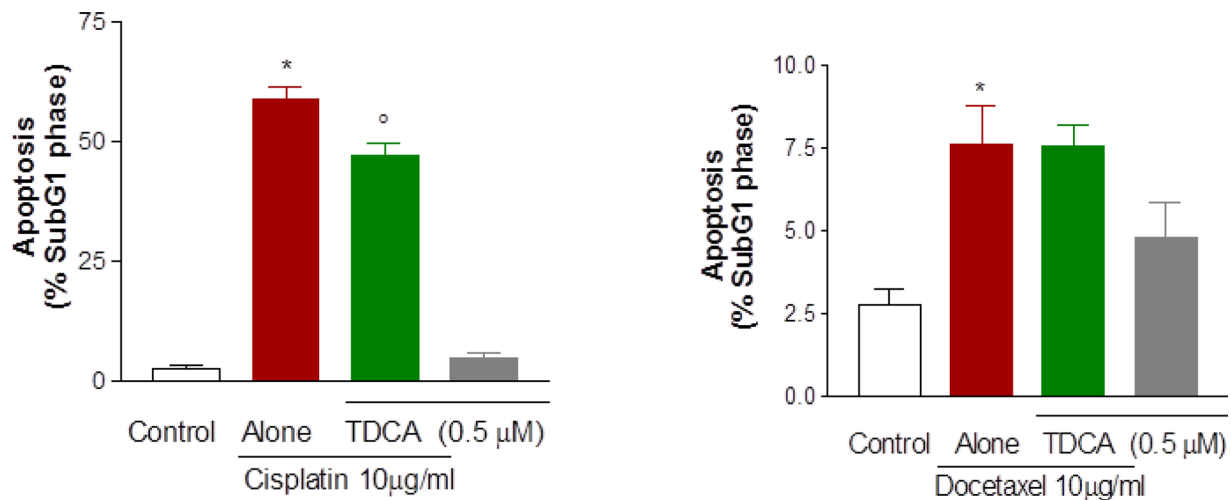

**Supplementary Figure S1: MKN-45 cells were plated at  $1 \times 10^6$  cells/well, and pre-treated with TDCA (0.5 µM) for 3 hours and then challenged with Cisplatin (10 µg/ml) or Docetaxel (10 µg/ml) for 24 hr. Cells were stained with propidium-iodide solution and percentage of apoptotic cells assessed by flow cytometry.**

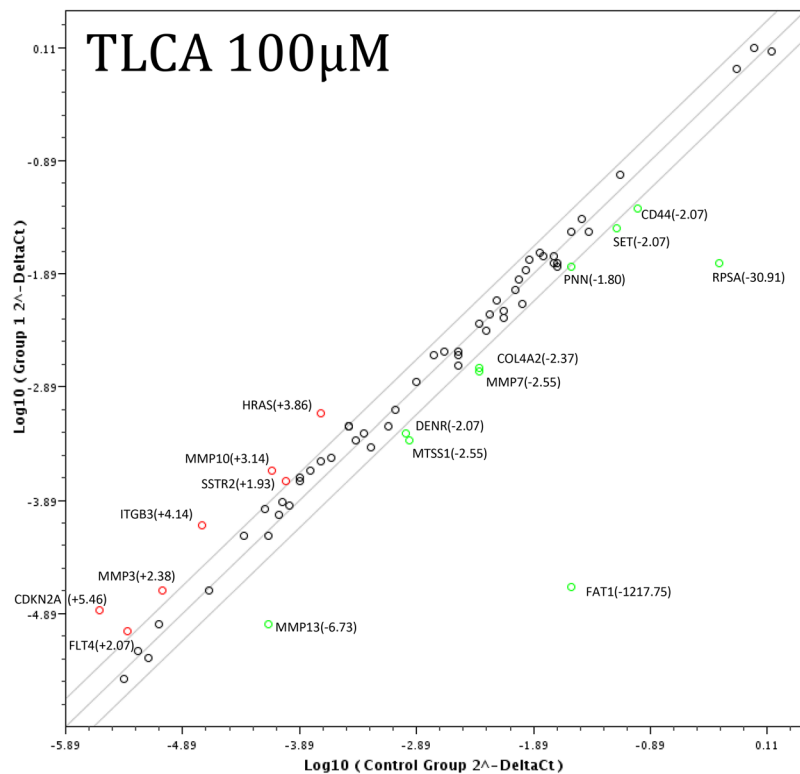

| Gene   | Fold Regulation |
|--------|-----------------|
| CDKN2A | 5,462           |
| FLT4   | 2,0705          |
| HRAS   | 3,8637          |
| ITGB3  | 4,1411          |
| MMP10  | 3,1383          |
| MMP3   | 2,3784          |
| SSTR2  | 1,9319          |
| CD44   | -2,0705         |
| COL4A2 | -2,3784         |
| DENR   | -2,0705         |
| FAT1   | -1217,7481      |
| MMP13  | -6,7272         |
| MMP7   | -2,5491         |
| MTSS1  | -2,5491         |
| PNN    | -1,8025         |
| RPSA   | -30,91          |
| SET    | -2,0705         |

**Supplementary Figure S2: MKN45 cells (1x10<sup>6</sup>) were plated, serum starved for 24 hours and then treated for 72 hours with TLCA 100µM.** The cDNA obtained from this cells was used to analyze the expression of genes related to tumor metastasis by a gne array. Array analysis was carried out with the online software RT2 Profiler PCR Array Data Analysis (<http://pcrdataanalysis.sabiosciences.com/pcr/arrayanalysis.php>). Up-regulated/down-regulated genes were those genes whose expressions had been altered by more than 1,9 fold.

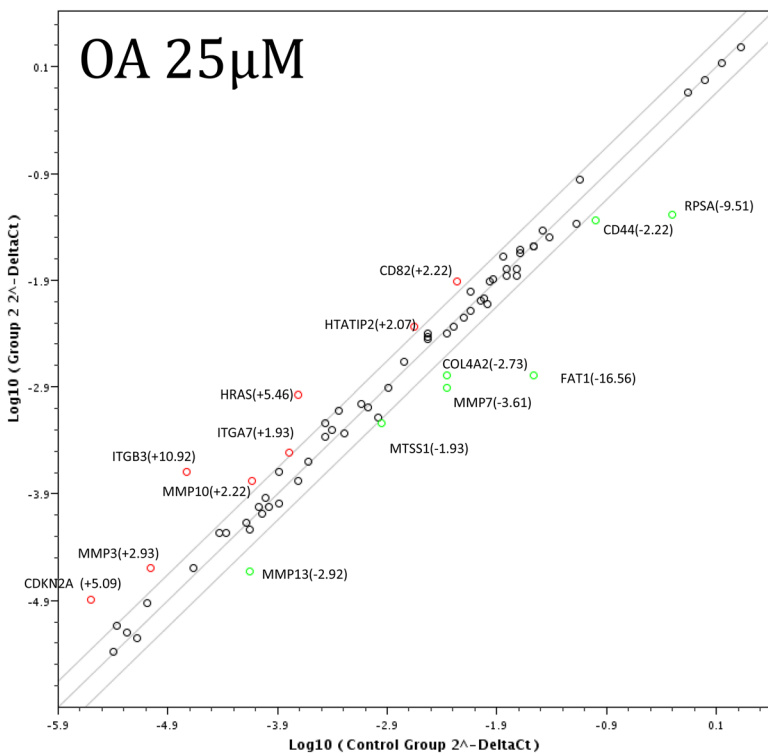

| Gene    | Fold Regulation |
|---------|-----------------|
| CD82    | 2,2191          |
| CDKN2A  | 5,0982          |
| HRAS    | 5,4642          |
| HTATIP2 | 2,0705          |
| ITGA7   | 1,9319          |
| ITGB3   | 10,9283         |
| MMP10   | 2,2191          |
| MMP3    | 2,9282          |
| CD44    | -2,2191         |
| COL4A2  | -2,7321         |
| FAT1    | -16,5642        |
| MMP13   | -2,9282         |
| MMP7    | -3,605          |
| MTSS1   | -1,9319         |
| RPSA    | -9,5137         |

**Supplementary Figure S3: MKN45 cells (1x10<sup>6</sup>) were plated, serum starved for 24 hours and then treated for 72 hours with OA 25µM.** The cDNA obtained from this cells was used to analyze the expression of genes related to tumor metastasis by a gne array. Array analysis was carried out with the online software RT2 Profiler PCR Array Data Analysis (<http://pcrdataanalysis.sabiosciences.com/pcr/arrayanalysis.php>). Up-regulated/down-regulated genes were those genes whose expressions had been altered by more than 1,9 fold.
